# Supplementary material
Source: PubMed Central journal article supplement (PMC6005725)
Supplement: NIHMS939974-supplement-supplement_1.pdf [file NIHMS939974-supplement-supplement_1.pdf]

Table S1. Significant stronger intrinsic NAc related FC at baseline

|                     |                                                                | Cluster size | Brain regions                                                                | MNI                            |      |     | Z value |     |
|---------------------|----------------------------------------------------------------|--------------|------------------------------------------------------------------------------|--------------------------------|------|-----|---------|-----|
|                     |                                                                |              |                                                                              | X                              | Y    | Z   |         |     |
| Slow 5              | NacL                                                           | 6445         | Bilateral NAc/putamen/caudate/<br>anterior insula/inferior temporal<br>gyrus | -14                            | 8    | -12 | Inf     |     |
|                     |                                                                |              | Bilateral OFC/sgACC/MPFC                                                     | -6                             | 40   | -2  | 4.42    |     |
|                     |                                                                |              | Bilateral hippocampus/amygdala                                               | 30                             | -12  | -24 | 4.01    |     |
|                     |                                                                |              | Left middle frontal gyrus                                                    | -26                            | 58   | 0   | 3.91    |     |
|                     |                                                                |              | 746 Left middle frontal gyrus/                                               | -26                            | 10   | 72  | 4.24    |     |
|                     | 584 Left temporal pole/fusiform<br>gyrus/middle temporal gyrus | -38          | 2                                                                            | -36                            | 5.05 |     |         |     |
|                     | 405 Right middle frontal gyrus                                 | 22           | 22                                                                           | 68                             | 4.24 |     |         |     |
|                     | NAcR                                                           | 7446         | Bilateral NAc/caudate/putamen                                                | 12                             | 8    | -10 | Inf     |     |
|                     |                                                                |              | Bilateral OFC/MPFC/sgACC                                                     | 0                              | 38   | -10 | 4.70    |     |
|                     |                                                                |              | 812 Bilateral middle cingulate<br>cortex/post cingulate                      | 2                              | -6   | 34  | 4.69    |     |
| Slow-4              | NacL                                                           | 4865         | Bilateral Nac/putamen/caudate                                                | -14                            | 6    | -12 | Inf     |     |
|                     |                                                                |              | Right anterior insula                                                        | 42                             | 8    | -6  | 5.01    |     |
|                     |                                                                |              | 953 Bilateral middle cingulate<br>cortex/rACC/                               | 8                              | 22   | 30  | 4.35    |     |
|                     | NAcR                                                           | 5803         | Bilateral NAc/putamen                                                        | 12                             | 8    | -10 | Inf     |     |
|                     |                                                                |              | Bilateral OFC/sgACC/mCC/rACC                                                 | -2                             | 40   | -12 | 4.72    |     |
|                     |                                                                |              | Right anterior insula                                                        | 40                             | 5    | -8  | 4.03    |     |
| Typical band        | NacL                                                           | 11848        | Bilateral NAc/putamen/caudate                                                | 14                             | 8    | -12 | Inf     |     |
|                     |                                                                |              | Right anterior insula                                                        | 38                             | 6    | -8  | 4.86    |     |
|                     |                                                                |              | Left hippocampus                                                             | -28                            | -28  | -10 | 4.46    |     |
|                     |                                                                |              | Bilateral OFC/sgACC/pgACC/rACC                                               |                                |      |     |         |     |
|                     |                                                                |              | 767 Right temporal gyrus/fusiform                                            | 44                             | 4    | -38 | 5.32    |     |
|                     |                                                                |              | Right amygdala/ hippocampus /<br>parahippocampus                             | 32                             | -16  | -24 | 3.51    |     |
|                     |                                                                |              | 489 Right middle frontal gyrus                                               | 34                             | 20   | 30  | 5.10    |     |
|                     | 379 Right superior temporal gyrus                              | 54           | -4                                                                           | -6                             | 4.27 |     |         |     |
|                     | 584 Left middle frontal gyrus                                  | -42          | 14                                                                           | 46                             | 3.69 |     |         |     |
|                     | NAcR                                                           | 11542        | 645                                                                          | Bilateral Nac/putamen/caudate  | 12   | 10  | -10     | Inf |
|                     |                                                                |              |                                                                              | Bilateral OFC/sgACC/pgACC/rACC | 0    | 40  | -10     | Inf |
| Right PCC/precuneus |                                                                |              |                                                                              | 2                              | -46  | 4   | 4.38    |     |
|                     |                                                                |              |                                                                              |                                |      |     |         |     |

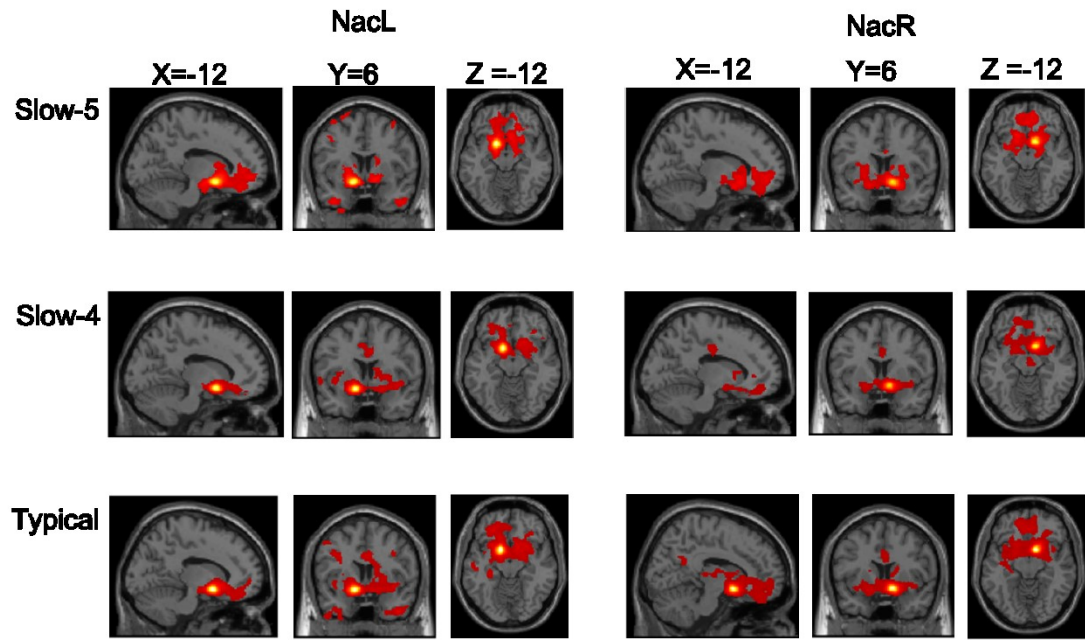

Figure S1
